# Supplementary material
Source: PubMed Central journal article supplement (PMC2885069)
Supplement: 00970.2009_1.pdf [file 00970.2009_1.pdf]

1 The video demonstrates the speed of vasodilation in first-order arterioles isolated from the red highly  
2 oxidative portion of the gastrocnemius muscle from young and old animals. The exposure to  
3 acetylcholine, and endothelium-dependent vasodilator, has been time aligned between the two vessels,  
4 i.e., video begins with exposure to stimuli. From the video both the blunted dynamics and magnitude of  
5 vasodilation with old age can be observed.
